# Supplementary material for: Electroretinography Reveals Difference in Cone Function between Syndromic and Nonsyndromic USH2A Patients
Source: PubMed Central journal article supplement (PMC5593892; doi:10.1038/s41598-017-11679-y), 2017-09-11
Supplement: 41598_2017_11679_MOESM1_ESM.pdf [file 41598_2017_11679_MOESM1_ESM.pdf]

## Supplementary Information

### Electroretinography Reveals Difference in Cone Function between Syndromic and Nonsyndromic *USH2A* Patients

Jesse D Sengillo<sup>1,2,3</sup>, Thiago Cabral<sup>1,2,4,5</sup>, Kaspar Schuerch<sup>1,2</sup>, Jimmy Duong<sup>6</sup>, Winston Lee<sup>1,2</sup>, Katherine Boudreault<sup>1,2,7</sup>, Yu Xu<sup>8</sup>, Sally Justus<sup>1,2</sup>, Janet R Sparrow<sup>2,9</sup>, Vinit B Mahajan<sup>10</sup>, Stephen H Tsang<sup>1,2,9\*</sup>

<sup>1</sup>Jonas Children's Vision Care, and Bernard & Shirlee Brown Glaucoma Laboratory, Department of Ophthalmology, Columbia University Medical Center, New York, NY, USA

<sup>2</sup>Edward S. Harkness Eye Institute, New York-Presbyterian Hospital, New York, NY, USA

<sup>3</sup>State University of New York Downstate Medical Center, Brooklyn, NY, USA

<sup>4</sup>Department of Ophthalmology, Federal University of Esp rito Santo, Vit ria, Brazil

<sup>5</sup>Department of Ophthalmology, Federal University of S o Paulo, S o Paulo, Brazil

<sup>6</sup>Department of Biostatistics, Columbia University, New York, NY, USA

<sup>7</sup>Department of Ophthalmology, University of Montreal, Montreal, Que., Canada

<sup>8</sup>Department of Ophthalmology, Xin Hua Hospital affiliate of Shanghai Jiao Tong University School of Medicine, Shanghai, China.

<sup>9</sup>Department of Pathology & Cell Biology, Stem Cell Initiative (CSCI), Institute of Human Nutrition, College of Physicians and Surgeons, Columbia University, New York, NY, USA.

<sup>10</sup>Omics Laboratory, Byers Eye Institute, Department of Ophthalmology, Stanford University, Palo Alto, CA, USA

\*Corresponding author

Running title: Cone Function in *USH2A* Patients

Address Correspondence:

Stephen H. Tsang, MD, PhD

Harkness Eye Institute

635 West 165<sup>th</sup> Street, Box 212, New York, NY 10032

Phone: (212) 342-1189 / Fax: 212-305-4987 / Email: sht2@columbia.edu

Supplemental Figure 1.

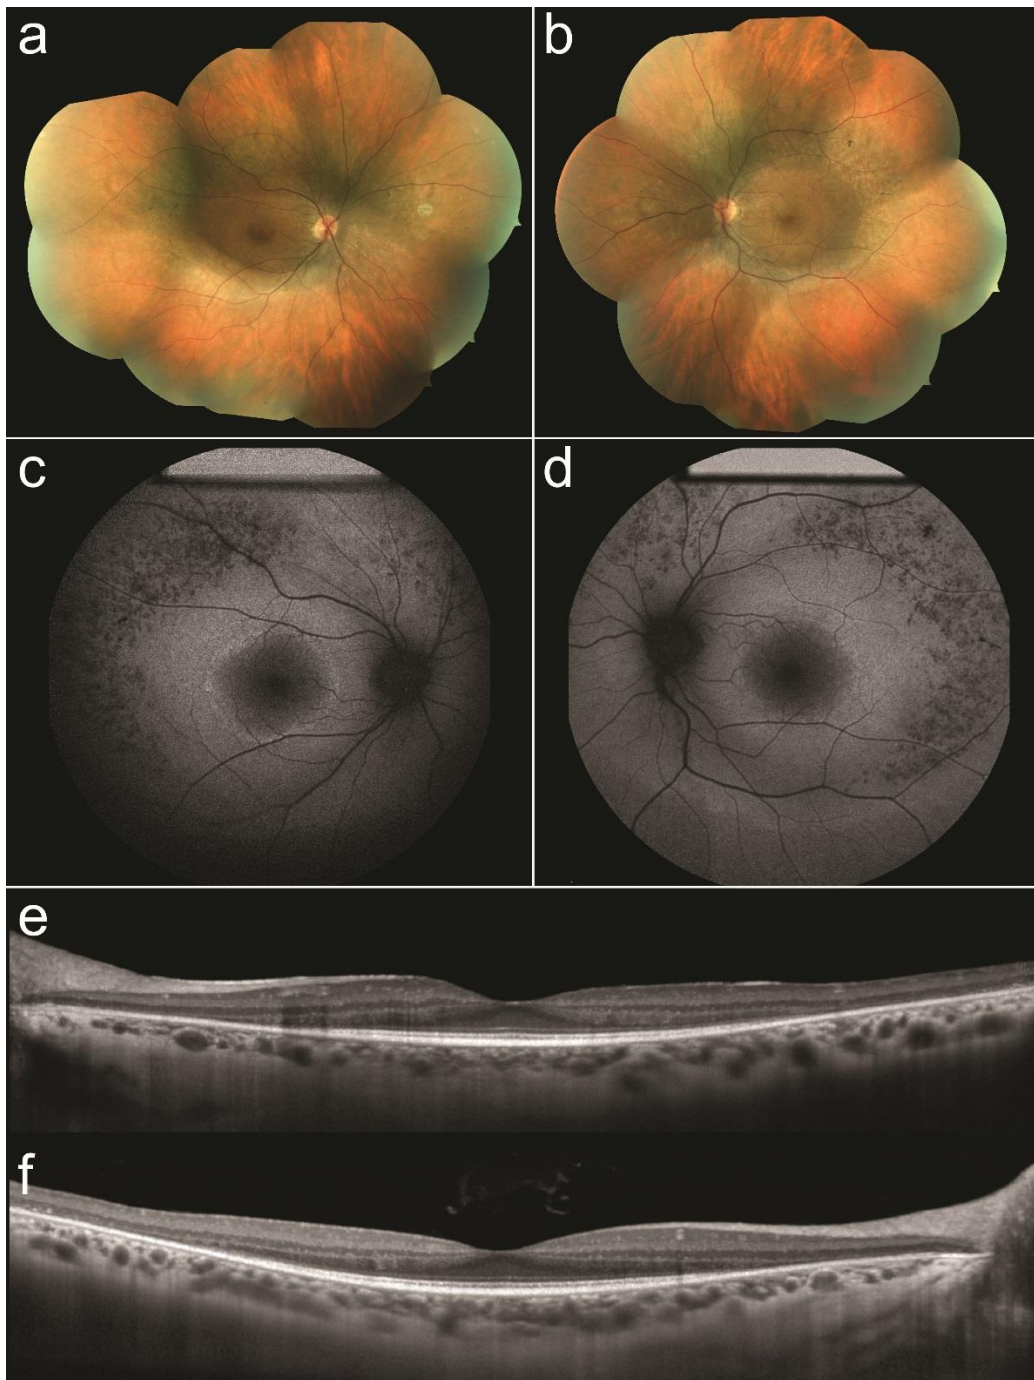

Supplemental Fig. 1. *Retinal imaging of an USH2A patient with normal audiometry.* Digital color fundus photography montage of the right (*a*) and left (*b*) eyes showing rare intraretinal pigment migration, pale discs, attenuated vasculature, and peripheral mottling. SW-AF imaging shows an autofluorescent ring in both eyes (*c*, *d*). SD-OCT of the right and left eyes (*e* and *f*) shows typical loss of outer nuclear layer in the periphery and sparing of the ellipsoid zone in the center macula.

Supplemental Table 1. All *USH2A* mutations in Patient Cohort

| <i>dbSNP</i> | <i>Exon</i> | <i>Intron</i> | <i>Nucleotide change</i>  | <i>Protein variant</i> | <i>Coding effect</i> |
|--------------|-------------|---------------|---------------------------|------------------------|----------------------|
| --           | 6           |               | c.895delC                 | p.(Gln299Asnfs*37)     | frameshift           |
| rs397517963  | 6           |               | c.1000C>T                 | p.(Arg334Trp)          | missense             |
| rs756570931  | 8           |               | c.1478A>G                 | p.(Tyr493Cys)          | missense             |
| rs483353054  | 10          |               | c.1724G>A                 | p.(Cys575Tyr)          | missense             |
| rs80338902   | 13          |               | c.2276G<T                 | p.(Cys759Phe)          | missense             |
| rs80338903   | 13          |               | c.2299delG                | p.(Glu767Serfs*21)     | frameshift           |
| --           | 17          |               | c3476C>T                  | p.(Pro1159Leu)         | missense             |
| --           | 17          |               | c.3713C>G                 | p.(Thr1238Arg)         | missense             |
| --           | 19          | 19            | c.4251+1G>A               | p.(?)                  | --                   |
| --           | 22          |               | c.4711G>C                 | p.(Ala1571Pro)         | missense             |
| --           | 29          |               | c.5848A>G                 | p.(Thr1950Ala)         | missense             |
| --           | 30          | 30            | c.6049+2T>G               | p.(?)                  | --                   |
| --           | 42          |               | c.8442_8443insT           | p.(Thr2815Tyrfs*20)    | frameshift           |
| rs372347027  | 44          | 43            | c.8682-9A>G               | p.(?)                  | --                   |
| rs73090721   | 48          |               | c.9459C>A                 | p.(Cys3153*)           | nonsense             |
| rs760858249  | 49          |               | c.9676C>T                 | p.(Arg3226*)           | nonsense             |
| --           | 50          | 49            | c.9740-1G>T               | p.(?)                  | --                   |
| rs148660051  | 51          |               | c.10073G>A                | p.(Cys3358Tyr)         | missense             |
| rs202175091  | 54          |               | c.10712C>T                | p.(Thr3571Met)         | missense             |
| rs111033418  | 55          |               | c.10759C>T                | p.(Gln3587*)           | nonsense             |
| --           | 61          |               | c.11918delC               | p.(Ala3973Valfs*11)    | frameshift           |
| rs750396156  | 63          |               | c.12574C>T                | p.(Arg4192Cys)         | missense             |
| rs199605265  | 63          |               | c.12575G>A                | p.(Arg4192His)         | missense             |
| rs527236137  | 63          |               | c.13010C>T                | p.(Thr4337Met)         | missense             |
| rs768161313  | 63          |               | c.13112_13115delAAAT      | p.(Gln4371Argfs*19)    | frameshift           |
| --           | 63          |               | c.13223T>C                | p.(Val4408Ala)         | missense             |
| --           | 63          |               | c.13231C>G                | p.(Leu4411Val)         | missense             |
| --           | 63          |               | c.13491_13499dupTACTCTCAC | p.(Thr4498_Thr4500dup) | in-frame             |
| --           | 64          |               | c.13943delG               | p.(Gly4648Aspfs*30)    | frameshift           |
| rs397517990  | 65          |               | c14287G>A                 | p.(Gly4763Arg)         | missense             |
| --           | 72          | 71            | c.15520-22_15524del27     | p.(?)                  | --                   |

Supplemental Table 2. Functional and structural indices of a 41-year old female with normal audiometry and NSRP due to biallelic *USH2A* mutations.

| <b>ffERG parameter</b>                                       | <b>OD</b>       | <b>OS</b>       | <b>Comments</b> |
|--------------------------------------------------------------|-----------------|-----------------|-----------------|
| <i>Scotopic B-wave Amplitude (<math>\mu\text{V}</math>)</i>  | 122             | 143             | <i>dtl</i>      |
| <i>30 Hz Flicker Amplitudes (<math>\mu\text{V}</math>)</i>   | 52              | 74              | <i>dtl</i>      |
| <i>30 Hz Flicker Implicit Time Delay (ms)</i>                | 31 <sup>d</sup> | 32 <sup>d</sup> | <i>dtl</i>      |
| <i>Ellipsoid Zone-line Length (<math>\mu\text{m}</math>)</i> | 3661            | 3810            | --              |
| <i>Horizontal ring diameter (<math>\mu\text{m}</math>)</i>   | 4784            | 4564            | --              |
| <i>Vertical Ring Diameter (<math>\mu\text{m}</math>)</i>     | 4145            | 3822            | --              |
